# Supplementary material
Source: PubMed Central journal article supplement (PMC9931653)
Supplement: NIHMS1860754-supplement-1.pdf [file NIHMS1860754-supplement-1.pdf]

## **SUPPLEMENTARY FIGURES**

**MYC Overexpression Drives Immune Evasion in Hepatocellular Carcinoma (HCC) that is Reversible  
Through Restoration of Pro-Inflammatory Macrophages**

## Supplementary Figure 1 MYC gene amplifications in Human Cancers

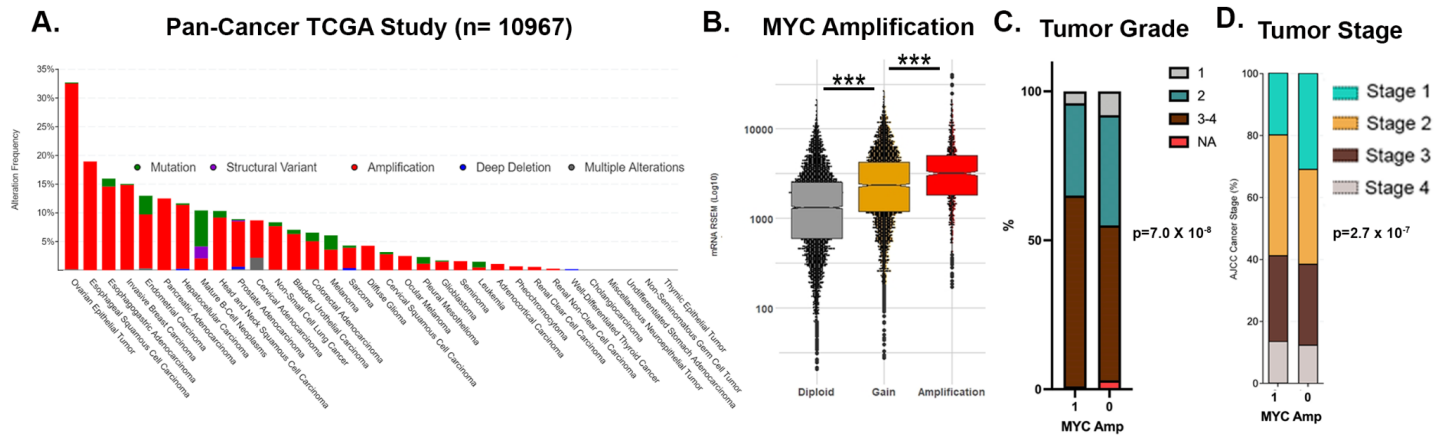

A. Prevalence of *MYC* gene amplifications across the 33 TCGA cancers.

B. *MYC* gene amplification strongly correlates with *MYC* mRNA expression across 33 cancers in the TCGA cohort.

C. Association of *MYC* amplification (1) in tumors with tumor grade across 33 cancers in the TCGA cohort.

D. Association of *MYC* amplification (1) in tumors with tumor stage across 33 cancers in the TCGA cohort.

## Supplementary Figure 2 Immune Changes Associated with MYC Overexpression in Human Tumors

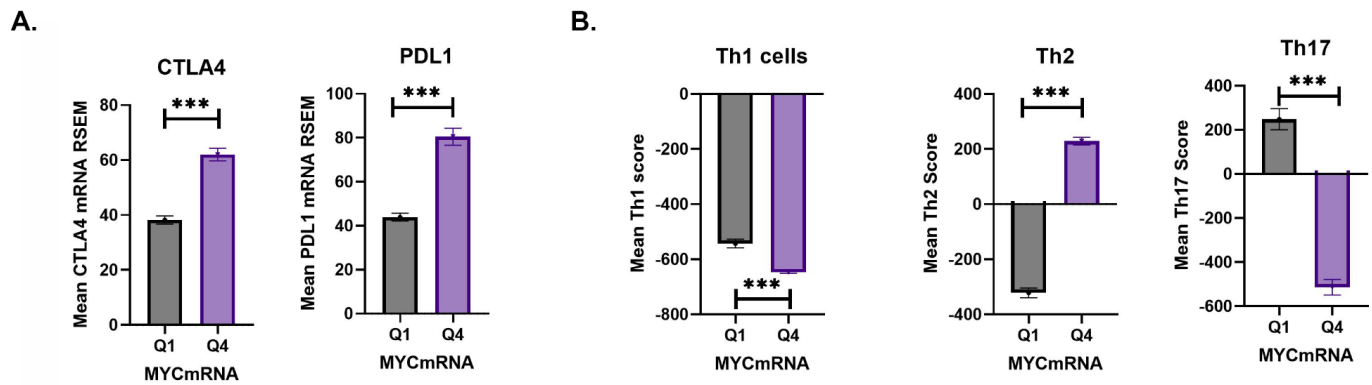

- A. Highest quartiles of MYC expression are associated with higher levels of PDL1 and CTLA4 expression across 33 cancers in the TCGA cohort.
- B. Highest quartiles of MYC expression are associated with lower Th1 expression, higher Th2 expression and lower Th17 immune signature expression scores across 33 cancers in the TCGA cohort.

Supplementary Figure 3 MYC mRNA and Protein Overexpression in Human Cancers.

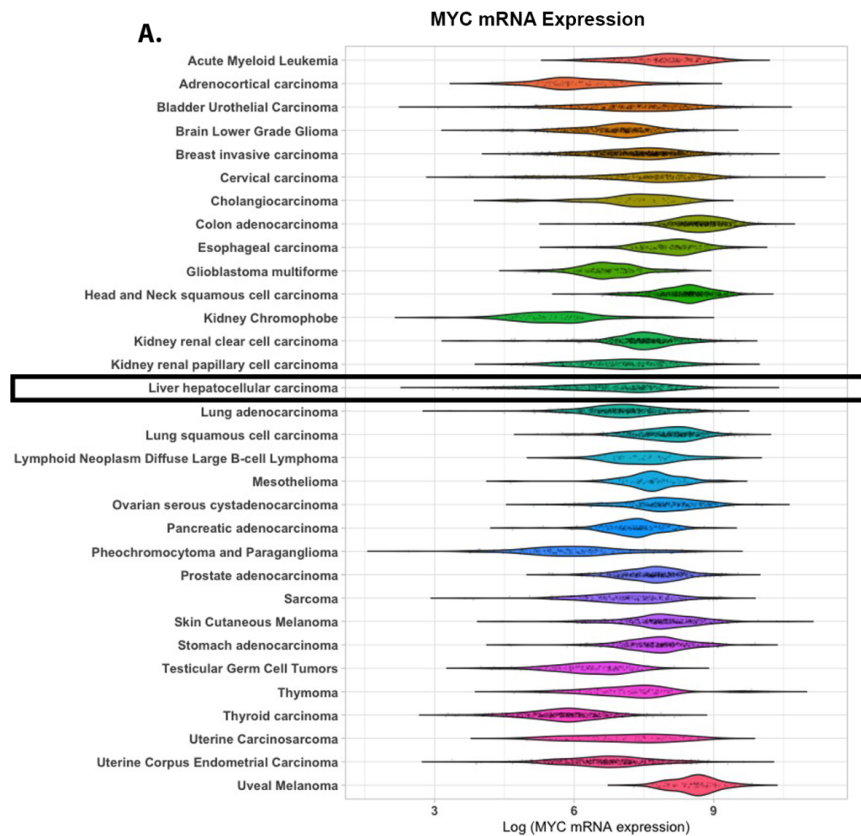

**B.**

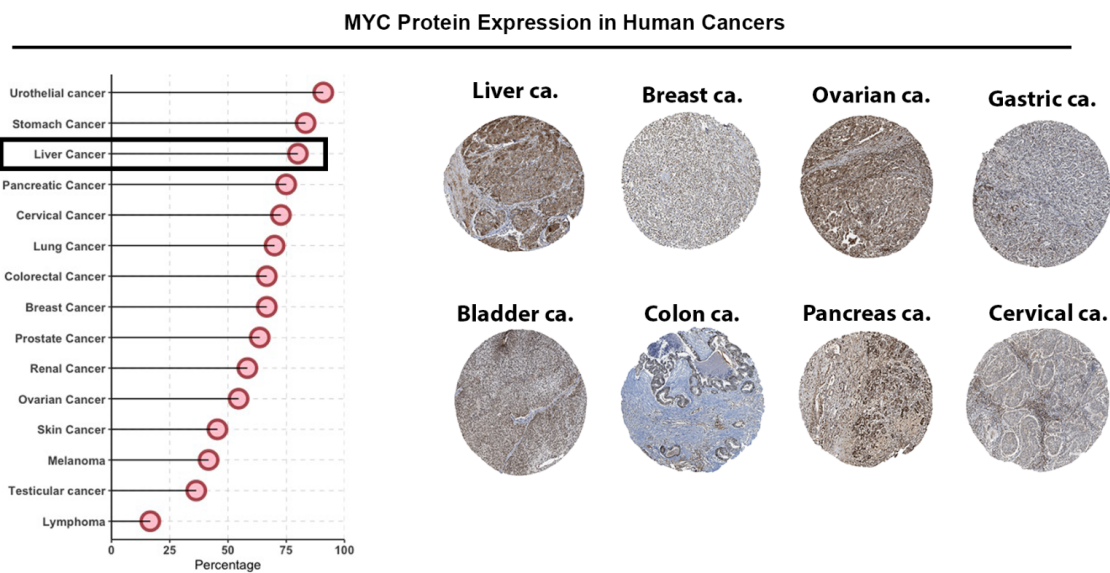

A. MYC gene mRNA expression across the 33 TCGA cancers.

B. Data from the Human Protein Atlas showing top 10 cancers with MYC protein overexpression

(<https://www.proteinatlas.org/ENSG00000136997-MYC/pathology>).



## Supplementary Figure 4 Pathways activated upon MYC inactivation in MYC-driven HCCs.

### Pathway analysis of DEG between MYC On and MYC Off (4 days)

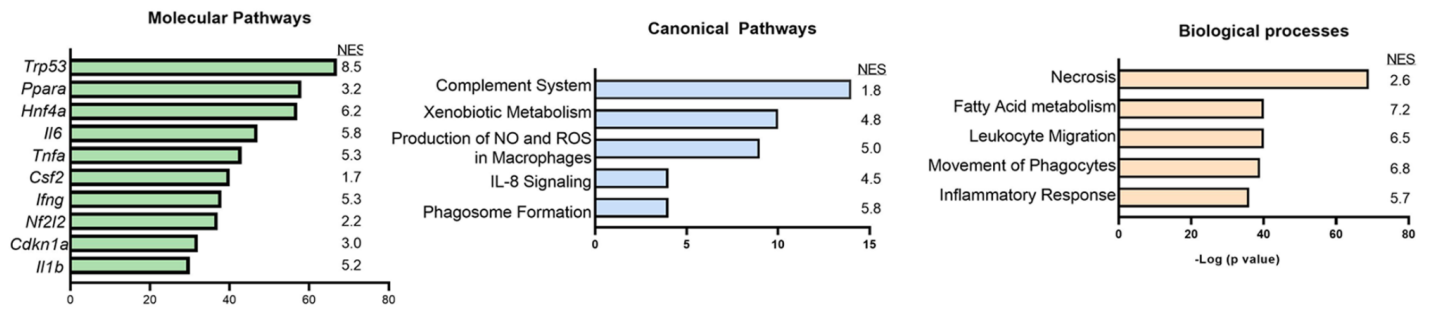

Top molecular pathways, canonical pathways and biological processes activated in murine MYC HCC (n=3) upon MYC inactivation for 4 days (n=3).

**Supplementary Figure 5 Pathways activated with MYC mutant or short term MYC inactivation in HCCs.**

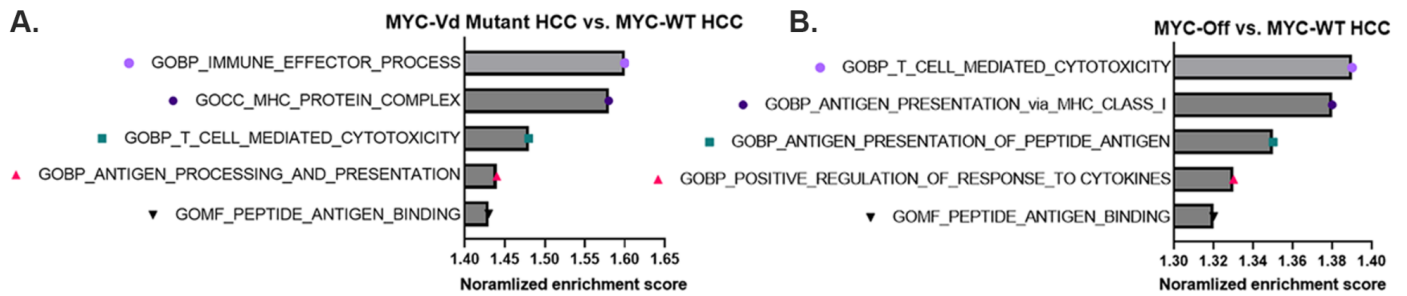

- A. Top molecular pathways activated in murine MYC HCC overexpressing MYC Vd mutant (MYC<sup>Vd</sup>, n=11) versus Wild Type MYC (n=16).
- B. Top molecular pathways activated in murine MYC HCC upon 16-hr MYC inactivation (n=8) versus those expressing Wild Type MYC (n=16).

## Supplementary Figure 6 Immune Checkpoint Inhibition Leads to Proliferative Arrest in MYC-HCC

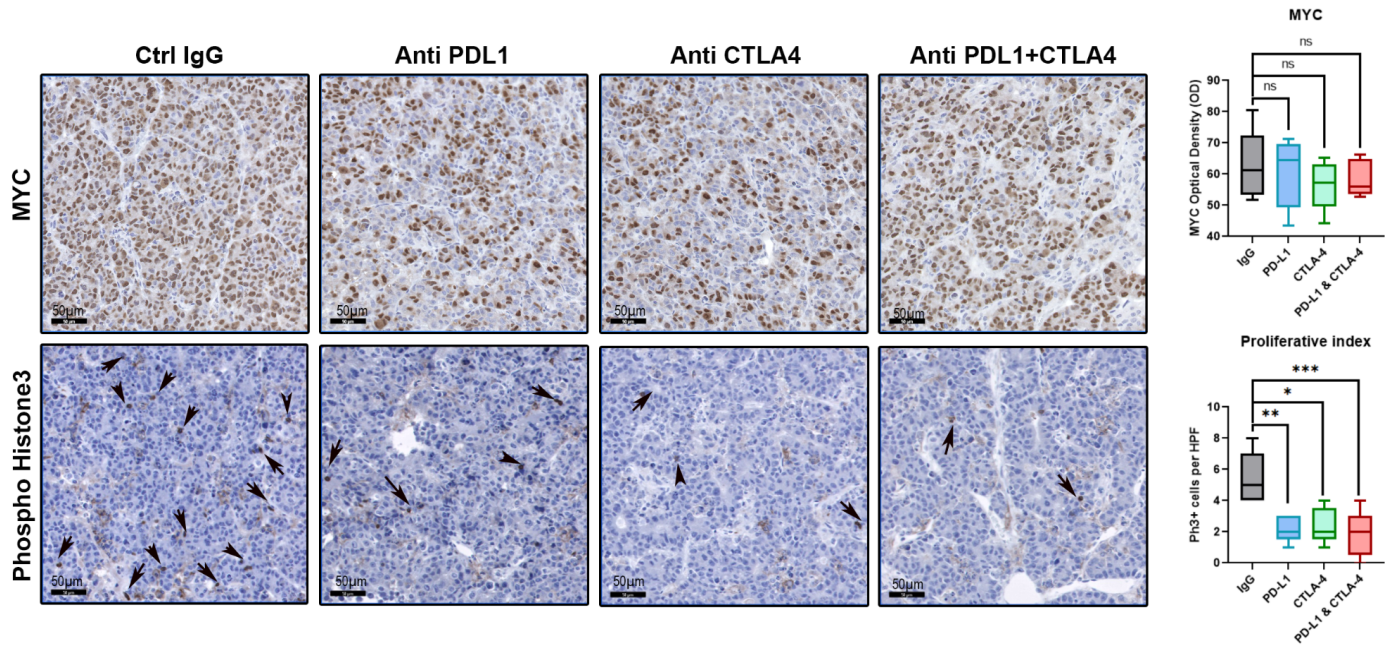

Immunohistochemistry showing MYC and phospho-histone 3 staining and quantification in MYC-HCC treated with IgG control (n=5), PDL1 antibody (n=5), CTLA4 antibody (n=5), or their combination.

## Supplementary Figure 7 Immune Checkpoint Inhibition Leads to Cell Death in MYC-HCC

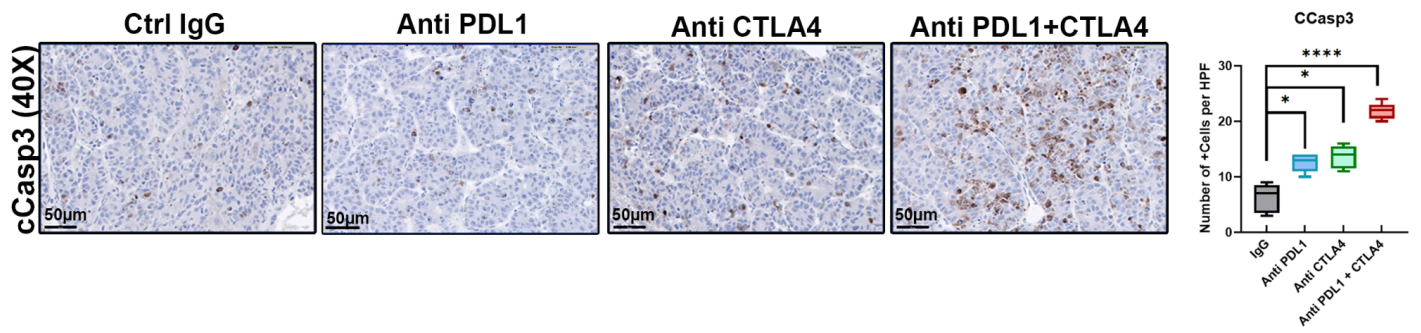

Immunohistochemistry showing cleaved caspase 3 staining and quantification in MYC-HCC treated with IgG control (n=5), PDL1 antibody (n=5), CTLA4 antibody (n=5), or their combination.

Supplementary Figure 8 Macrophage repolarization with combination Immune Checkpoint inhibition in MYC-HCC

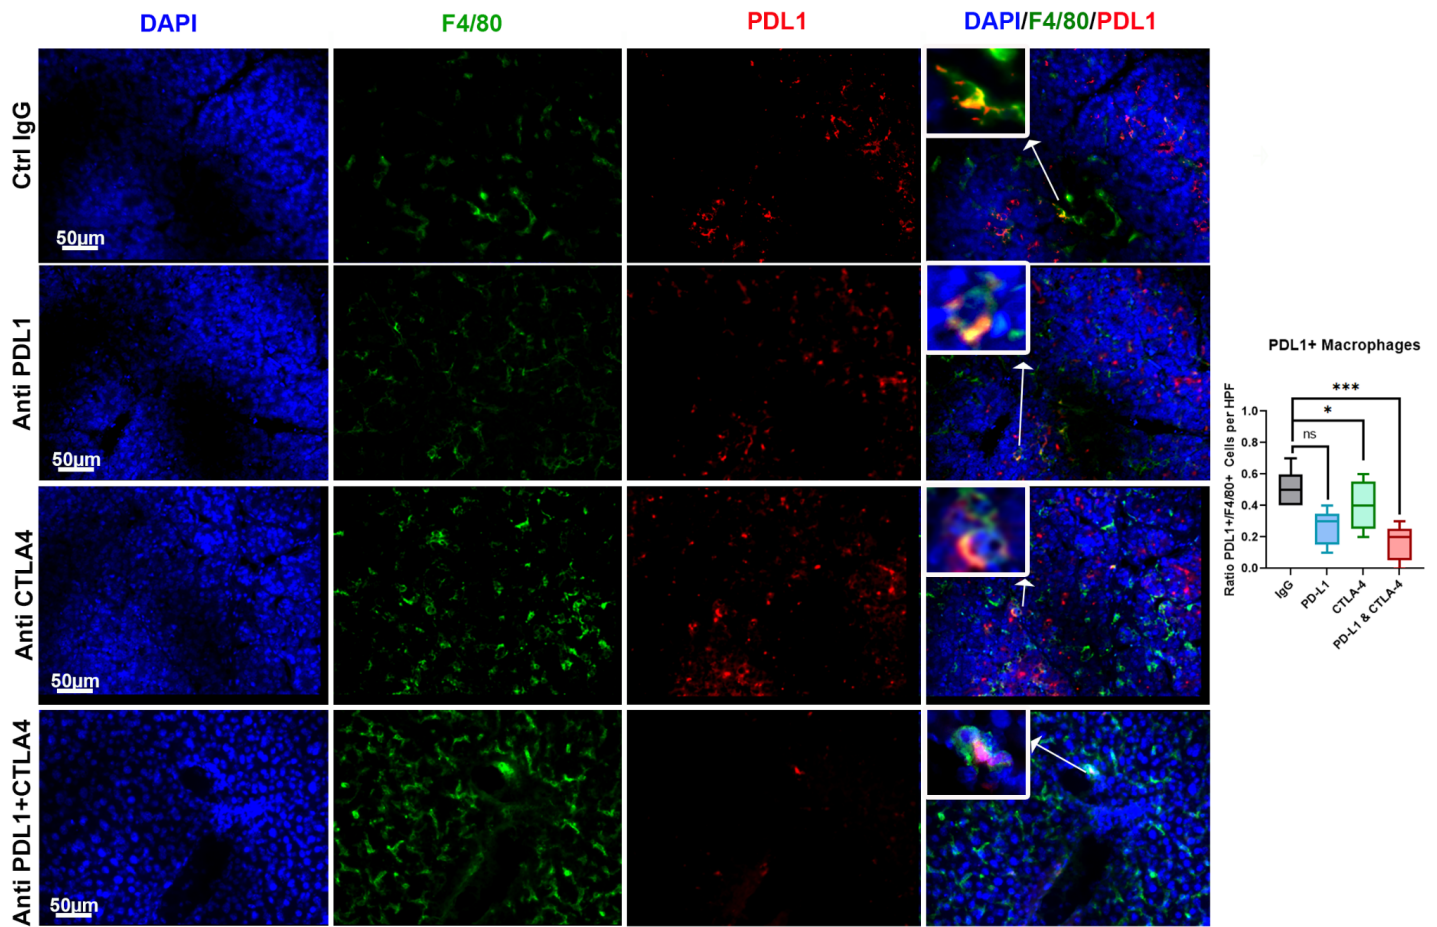

Immunofluorescence showing PDL1 and F4/80 double staining and quantification in MYC-HCC treated with IgG control (n=5), PDL1 antibody (n=5), CTLA4 antibody (n=5), or their combination (n=5).

## Supplementary Figure 9 Transcriptomic changes induced by immunotherapy in MYC-HCC

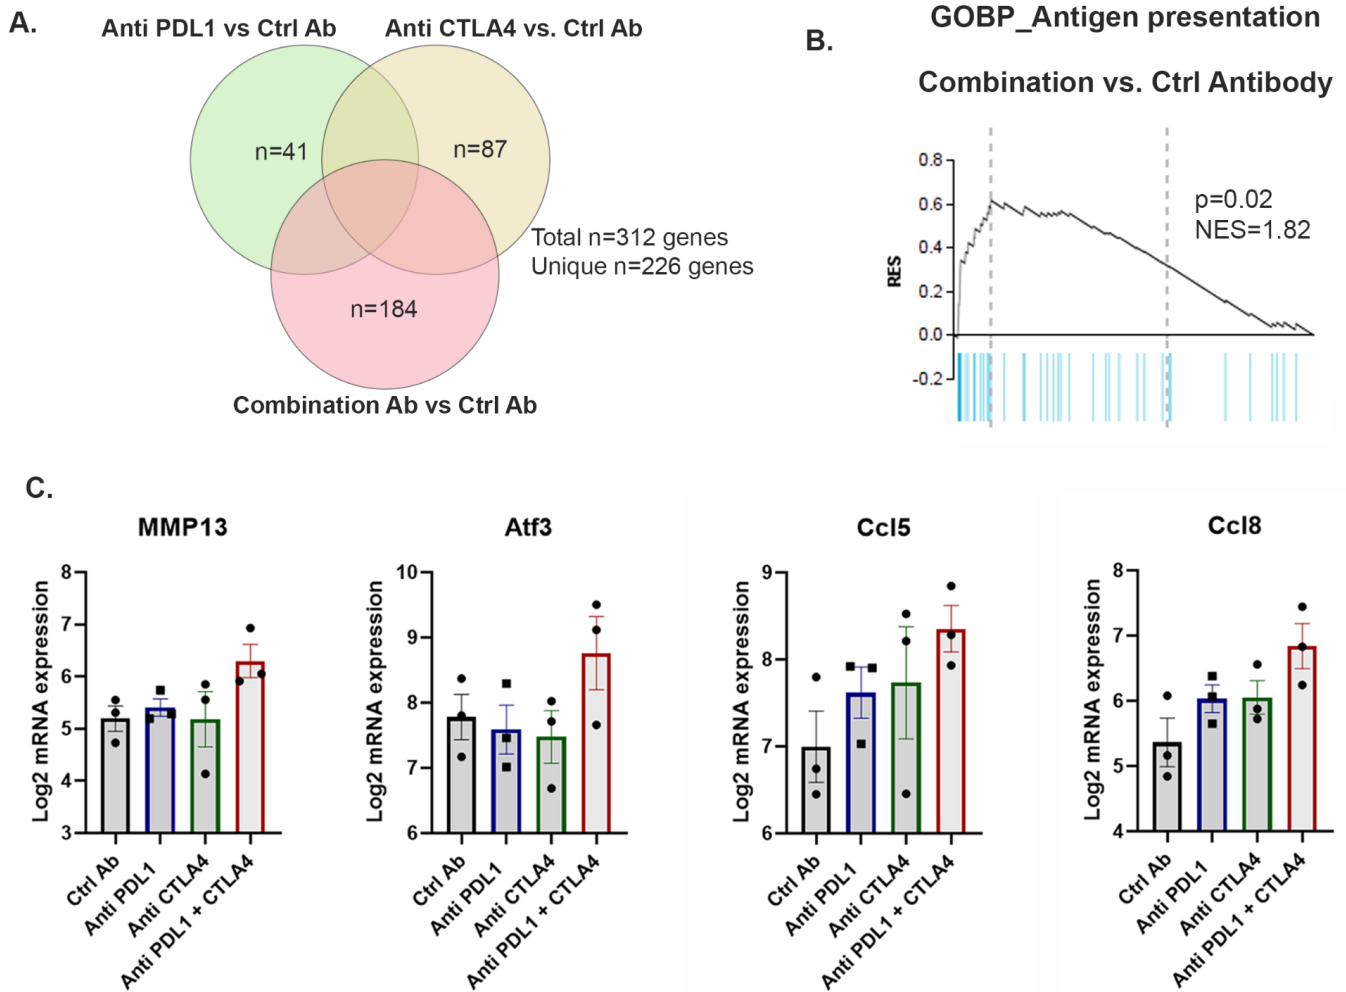

- A. Venn diagram showing the meta-analysis of the three different comparisons between tumors treated with anti PDL1 antibody alone (n=3), anti CTLA4 ab (n=3, combination of anti PDL1 and CTLA4 antibodies (n=3) or control IgG antibody (n=3).
- B. Enrichment of antigen presentation pathway in tumors treated with combination of anti PDL1 and CTLA4 antibodies (n=3) versus control IgG antibody (n=3).
- C. Specific macrophage related genes that are upregulated in tumors treated with combination of anti PDL1 and CTLA4 antibodies (n=3) versus anti PDL1 (n=3) or anti CTLA 4 (n=3) monotherapies or control IgG antibody (n=3).

**Supplementary Figure 10 Mass Cytometry Analysis of Immune Response to Immune Checkpoint Inhibitors in MYC-HCC**

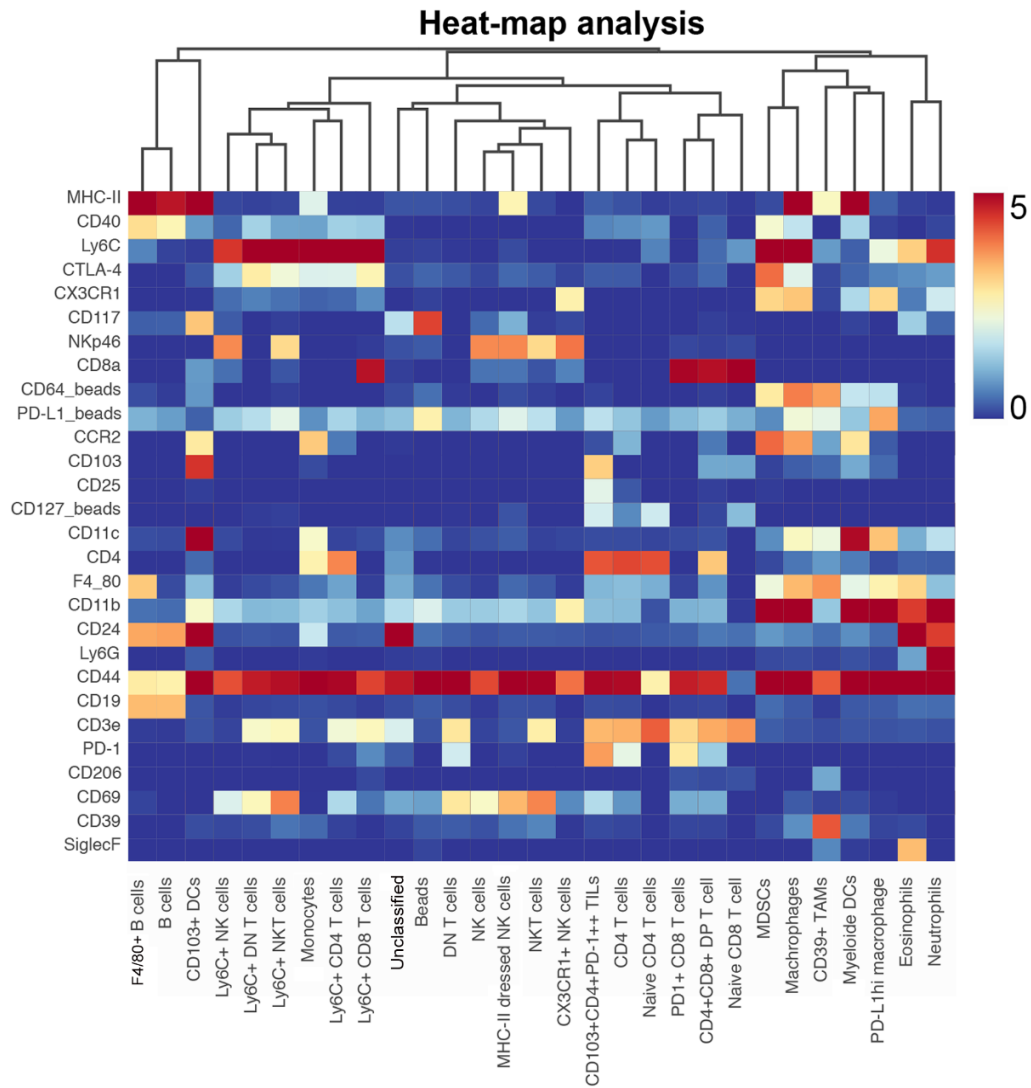

Heatmap shows expression of different immune markers in the identified immune subsets from the mass cytometry analysis of MYC-HCC treated with IgG control (n=3), PDL1 antibody (n=3), CTLA4 antibody (n=2), or their combination (n=4).



# Supplementary Figure 11 Inflammatory macrophages increase with combination immunotherapy of MYC-HCC

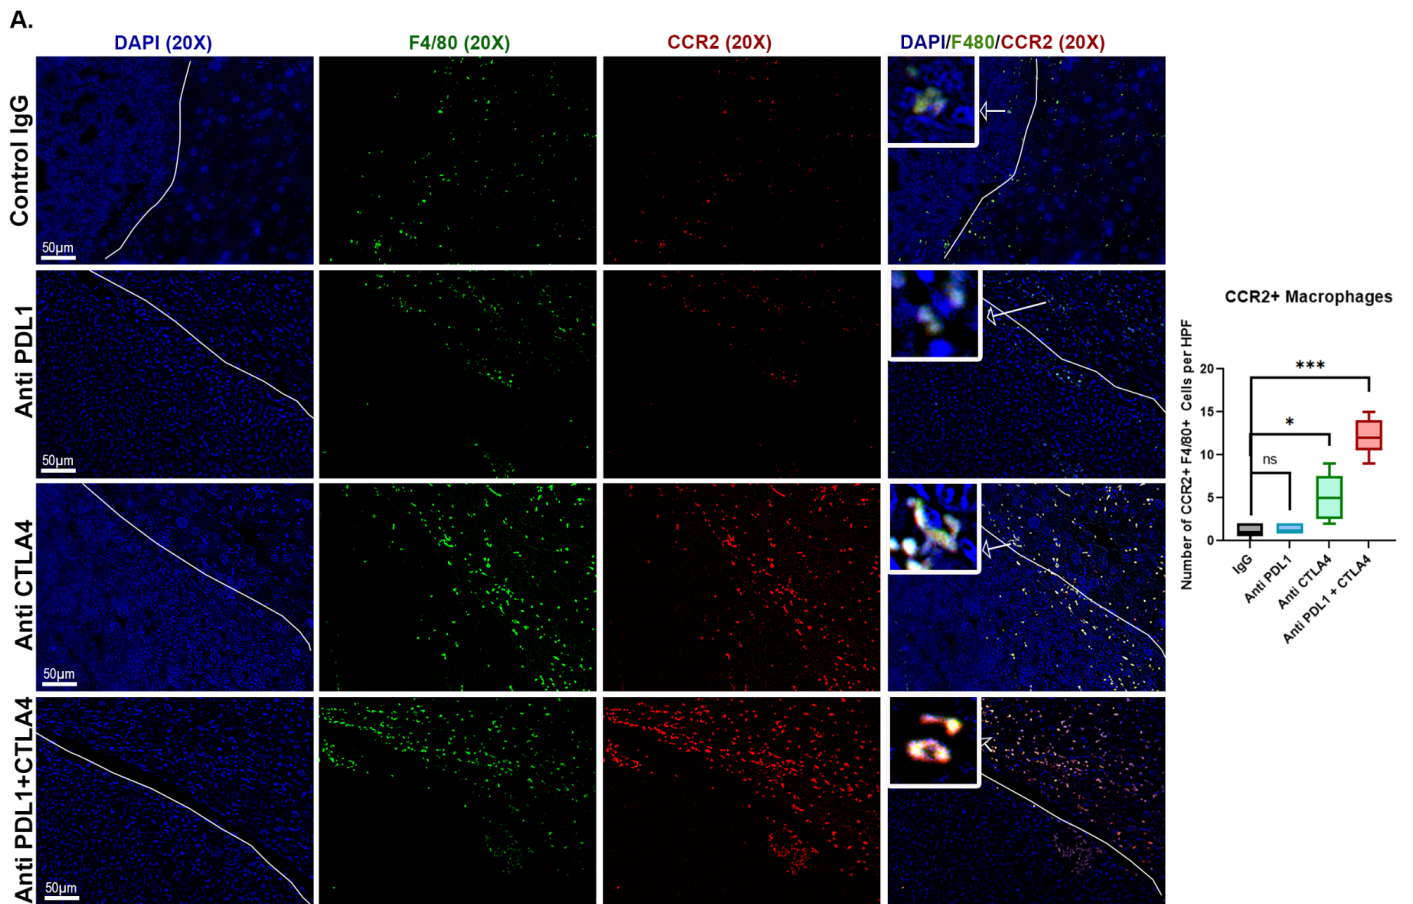

Immunofluorescence showing CCR2 and F4/80 double staining and quantification in MYC-HCC treated with IgG control (n=3), PDL1 antibody (n=3), CTLA4 antibody (n=3), or their combination (n=3).



## Supplementary Figure 12 M2-like macrophages decrease with combination immunotherapy of MYC-HCC

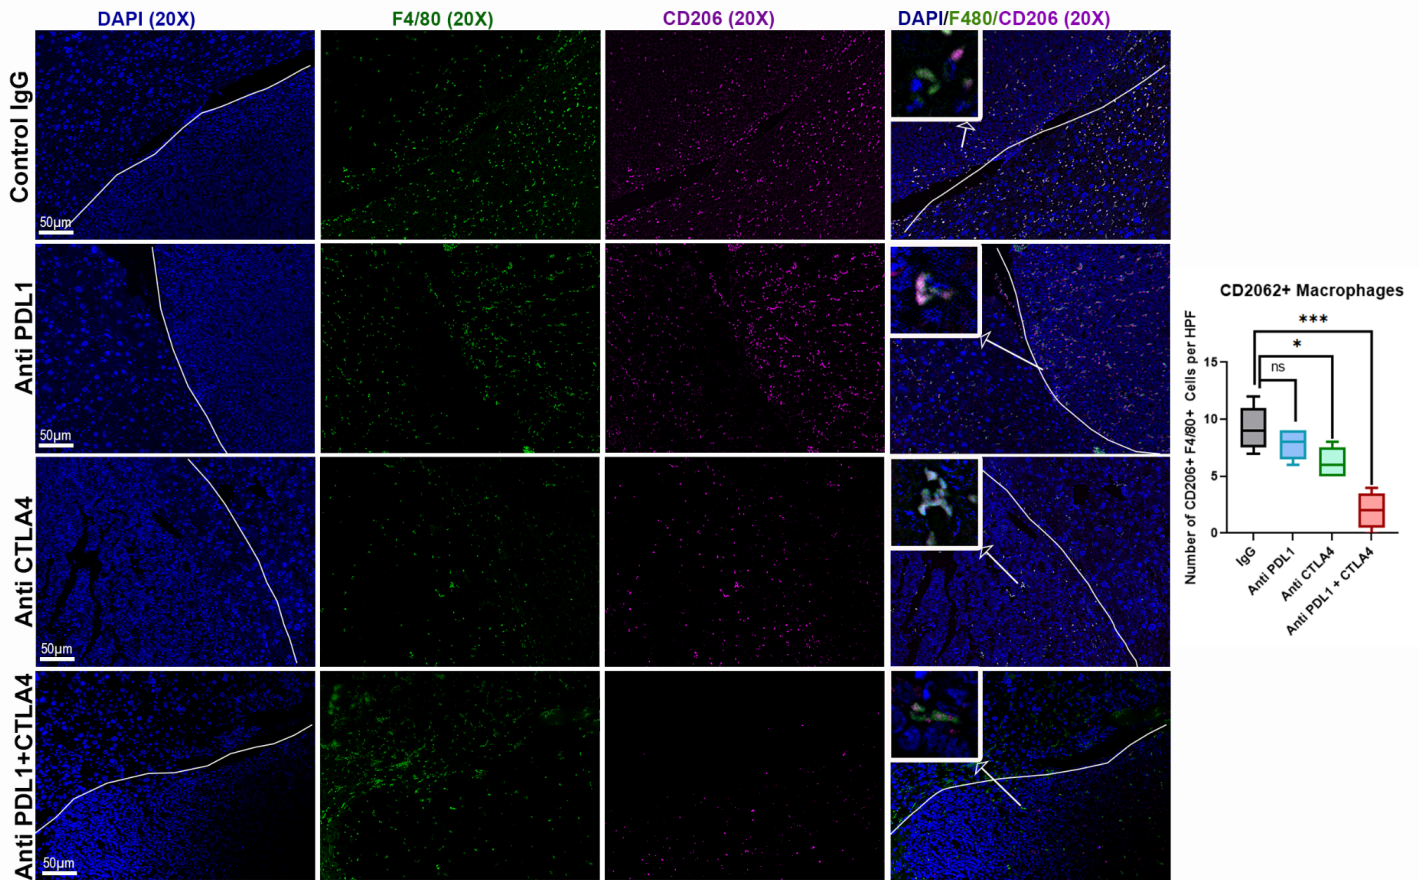

Immunofluorescence showing CD206 and F4/80 double staining and quantification in MYC-HCC treated with IgG control (n=3), PDL1 antibody (n=3), CTLA4 antibody (n=3), or their combination (n=3).

**Supplementary Figure 13 No change in other Major Immune Subsets between the treatment groups**

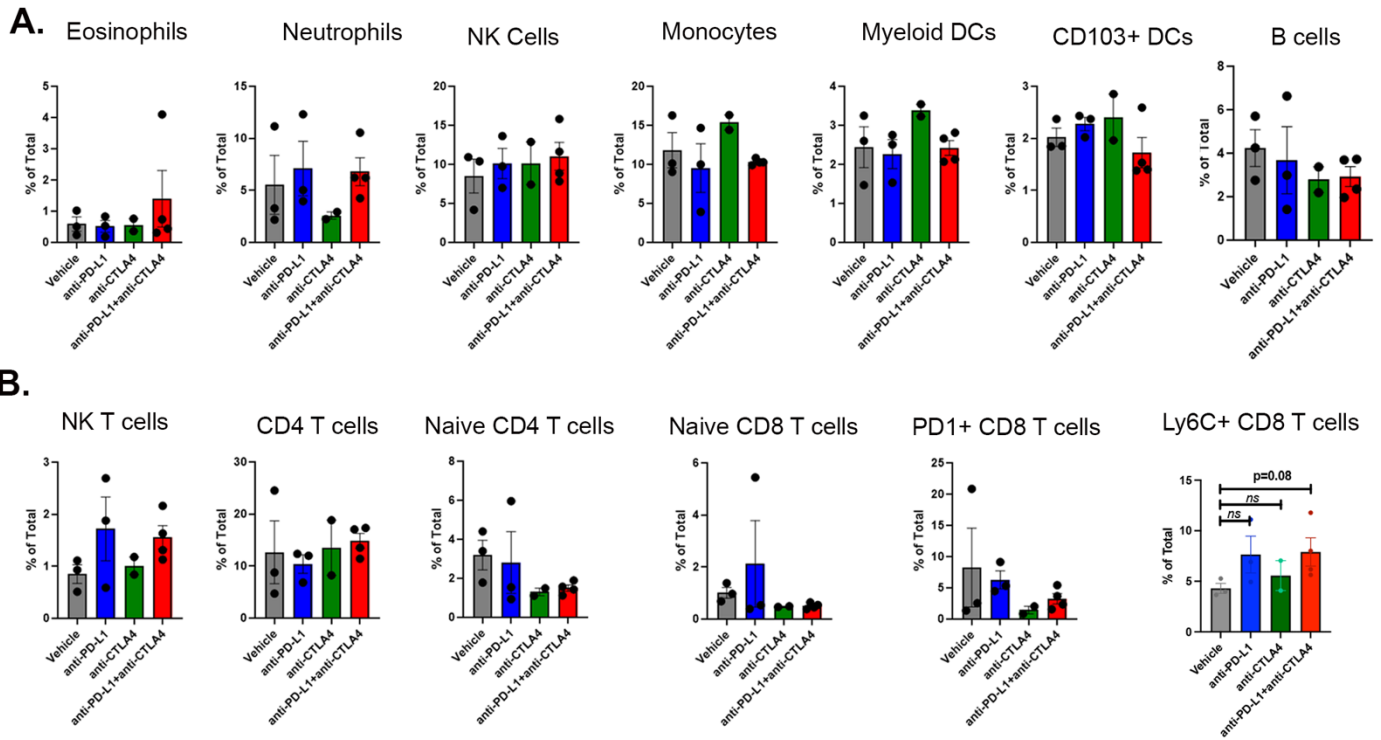

A and B. Comparison of abundance of multiple immune subsets on mass cytometry analysis in MYC-HCC treated with IgG control, PDL1 antibody, CTLA4 antibody, or their combination.

## Supplementary Figure 14 Anti CSF1R Treatment in MYC-HCC

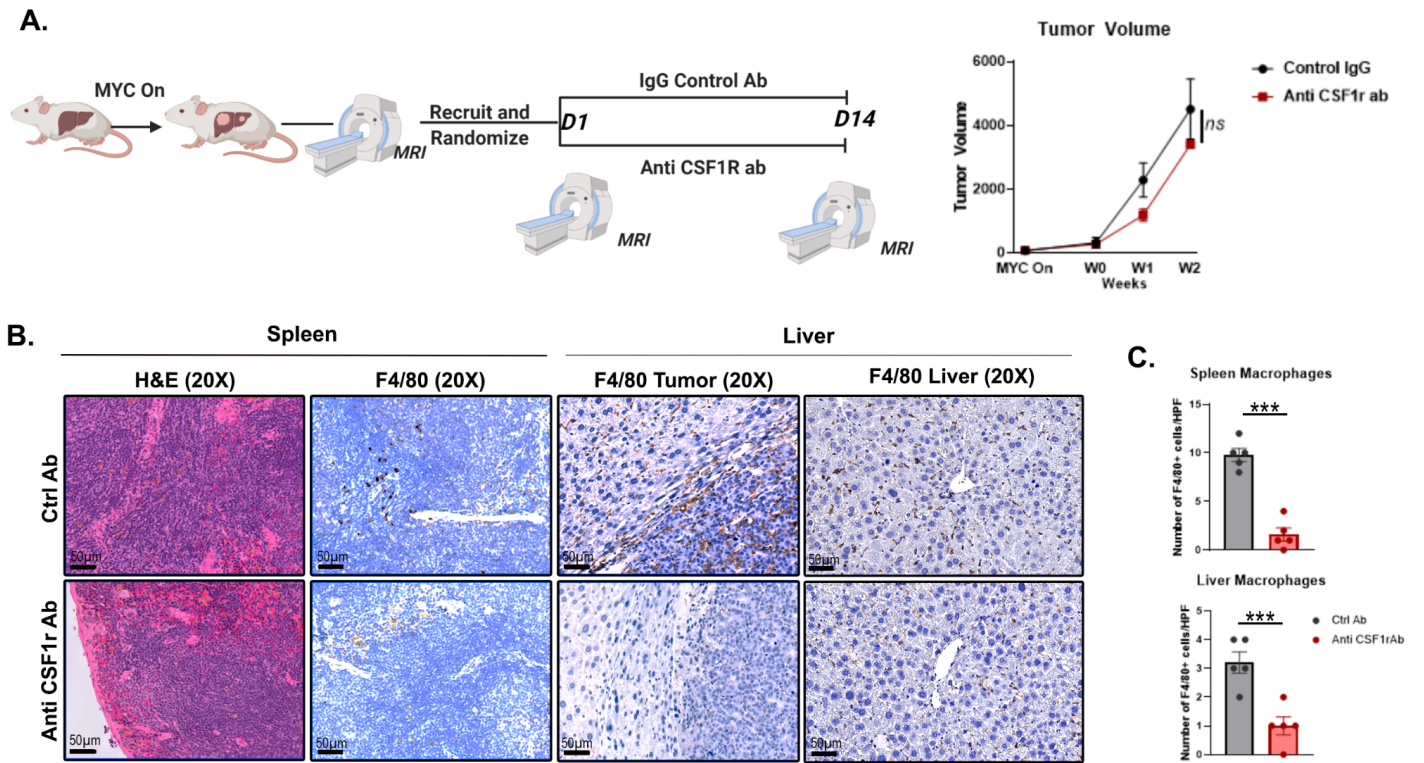

A. Experimental scheme of MYC-HCC mice treated with anti CSF1R antibody (n=4) or control antibody (n=4). No difference in tumor progression was noted on MRI volumetric tumor measurement.

B. Representative images of spleen and IHC for F4/80 confirming macrophage depletion with anti CSF1R antibody both in the spleen and the tumor and non-tumorous liver.

C. Quantification of splenic and liver macrophages in CSF1R antibody-treated MYC-HCC mice compared to control antibody treated mice.
